# Supplementary material for: Infrared-driven dynamics and scattering mechanisms of NO radicals with propane and butane: impacts of pseudo Jahn–Teller effects
Source: Royal Society of Chemistry journal article supplement (doi:10.1039/d4cp02254h), 2024-01-01
Supplement: d4cp02254h1.pdf [file d4cp02254h1.pdf]

**Supporting Information for Infrared-Driven Dynamics and Scattering Mechanisms of NO  
Radicals with Propane and Butane: Impacts of Pseudo Jahn-Teller Effects**

P. Garrett Burroughs, W. Churchill Wilkinson, Ellora Majumdar, Jacob D. Bole, Reeva Subedi,  
Joshua T. Kerrigan, Nathanael M. Kidwell\*

Department of Chemistry, The College of William & Mary, Williamsburg, VA 23187-8795,  
USA

**Contents:**

|                                                                                                           |                  |
|-----------------------------------------------------------------------------------------------------------|------------------|
| <b>Rovibrational Simulations and Spectroscopic Constants for the IR Action Spectrum of NO-Ethane.....</b> | <b>Pg. 2 – 3</b> |
| <b>Calculated Cartesian Coordinates for NO-Ethane, NO-Propane, and NO-(n-Butane).....</b>                 | <b>Pg. 4 – 5</b> |

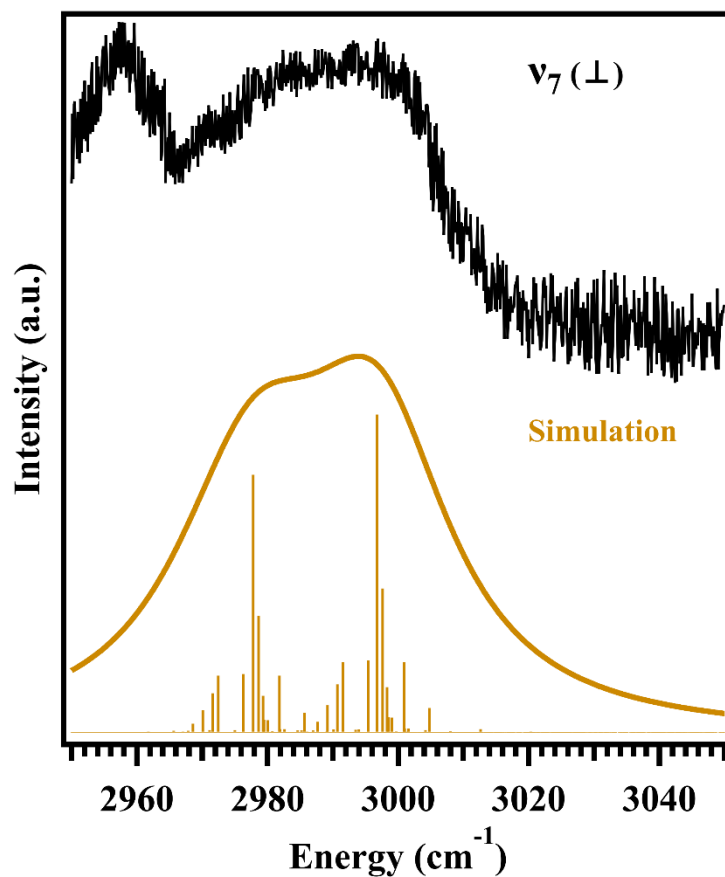

**Figure S1:** Experimental IR action spectrum for the NO-ethane collision complex compared with rovibrational simulations. The rovibrational simulations were obtained using the fitting procedure described in the main text and the spectroscopic constants listed in Table S1. The gold trace represents the fitted spectrum by convoluting each stick with a Lorentzian line shape function.

**Table S1. Spectral Fitting Parameters Obtained for the NO-Ethane Rovibrational Simulations<sup>a</sup>**

| Parameter <sup>b</sup> | $\nu_{18} (e_u)$                 | $\nu_{17} (e_u)$                   |
|------------------------|----------------------------------|------------------------------------|
|                        | Value                            | Value                              |
| $\nu_0$                | 2994.1(3)                        | 2975.3(3)                          |
| $A'' / A'$             | 2.67(1) / 2.34(1) <sup>c</sup>   | 0.7742(1) / 0.7736(1) <sup>c</sup> |
| $B'' / B'$             | 0.663(1) / 0.645(1) <sup>c</sup> | 0.1199(1) / 0.1199(1) <sup>c</sup> |
| $D_{J''}$              | $1.03 \times 10^{-6}(1)$         | $1.03 \times 10^{-6}(1)$           |
| $D_{J''K''}$           | $2.66 \times 10^{-6}(1)$         | $2.66 \times 10^{-6}(1)$           |
| $D_{K''}$              | $1.09 \times 10^{-5}(1)$         | $1.09 \times 10^{-5}(1)$           |
| $\Delta\nu_{Lor}$      | 25(1)                            | 25(1)                              |
| $T_{rot} (K)$          | 4(1)                             | 4(1)                               |

<sup>a</sup> Standard deviations ( $2\sigma$ ) for each parameter are given in parentheses.

<sup>b</sup> Otherwise indicated, all values are given in wavenumbers ( $\text{cm}^{-1}$ ).

<sup>c</sup> Obtained from M. Hepp and M. Herman, Weak Combination Bands in the 3-mm Region of Ethane, *J. Mol. Spectrosc.*, **1999**, 197, 56–63.

### NO-Ethane Cartesian Coordinates

| Atom | x         | y         | z         |
|------|-----------|-----------|-----------|
| C    | -1.600425 | 0.062307  | 0.000000  |
| C    | -1.088980 | 1.497929  | 0.000000  |
| H    | -2.689253 | 0.033222  | 0.000000  |
| H    | 0.000000  | 1.531972  | 0.000000  |
| H    | -1.435771 | 2.038494  | 0.879619  |
| H    | -1.257661 | -0.480460 | -0.880475 |
| H    | -1.435771 | 2.038494  | -0.879619 |
| H    | -1.257661 | -0.480460 | 0.880475  |
| N    | 1.333322  | -1.474057 | 0.000000  |
| O    | 1.859912  | -0.465536 | 0.000000  |

### NO-Propane Cartesian Coordinates

| Atom | x         | y         | z         |
|------|-----------|-----------|-----------|
| C    | 0.000000  | 0.958782  | 0.000000  |
| C    | 1.466037  | 0.544460  | 0.000000  |
| N    | -1.334721 | -2.069093 | 0.000000  |
| O    | -0.302558 | -2.547793 | 0.000000  |
| C    | -0.162332 | 2.473937  | 0.000000  |
| H    | 1.582822  | -0.539192 | 0.000000  |
| H    | 1.976570  | 0.936101  | 0.880704  |
| H    | -0.500537 | 0.539792  | -0.875704 |
| H    | 1.976570  | 0.936101  | -0.880704 |
| H    | -0.500537 | 0.539792  | 0.875704  |
| H    | -1.211869 | 2.766267  | 0.000000  |
| H    | 0.309133  | 2.912030  | -0.880611 |
| H    | 0.309133  | 2.912030  | 0.880611  |

**NO-(n-Butane) Cartesian Coordinates**

| Atom | x         | y         | Z         |
|------|-----------|-----------|-----------|
| C    | 1.450369  | 1.035223  | 0.000000  |
| C    | 0.000000  | 0.569982  | 0.000000  |
| C    | -0.986924 | 1.730762  | 0.000000  |
| N    | 0.516836  | -2.687074 | 0.000000  |
| O    | 1.644241  | -2.533439 | 0.000000  |
| H    | 2.145365  | 0.195557  | 0.000000  |
| H    | 1.660240  | 1.642958  | 0.880918  |
| H    | -0.189316 | -0.056035 | -0.876745 |
| H    | 1.660240  | 1.642958  | -0.880918 |
| H    | -0.189316 | -0.056035 | 0.876745  |
| C    | -2.436357 | 1.261467  | 0.000000  |
| H    | -0.800103 | 2.358338  | -0.875521 |
| H    | -0.800103 | 2.358338  | -0.875521 |
| H    | -3.131186 | 2.100769  | 0.000000  |
| H    | -2.645065 | 0.652790  | 0.880602  |
| H    | -2.645065 | 0.652790  | -0.880602 |
